# Supplementary material for: A Multiplex Molecular Cell-Based Sensor to Detect Ligands of PPARs: An Optimized Tool for Drug Discovery in Cyanobacteria
Source: MDPI journal article supplement (doi:10.3390/s23031338), 2023-01-25
Supplement: s1 [file s1]

SUPPORTING INFORMATION

**A multiplex molecular cell-based sensor to detect ligands of PPARs: an optimized tool for drug discovery in cyanobacteria**

Inês Páscoa <sup>1‡</sup>, Rita Biltres <sup>1,2,3‡</sup>, João Sousa <sup>1</sup>, Marco Preto <sup>1</sup>, Vitor Vasconcelos <sup>1,3</sup>, Luís Filipe Castro <sup>1,3</sup>, Raquel Ruivo <sup>1</sup> and Isabel Cunha <sup>1\*</sup>

<sup>1</sup> CIIMAR/CIMAR - Interdisciplinary Centre of Marine and Environmental Research, University of Porto, 4450-208 Portugal

<sup>2</sup> ICBAS - Instituto de Ciências Biomédicas Abel Salazar, University of Porto, 4050-313 Portugal

<sup>3</sup> FCUP - Faculty of Sciences, Department of Biology, University of Porto, 4169-007 Portugal

\*Correspondence: IC - isabel.cunha@ciimar.up.pt; (+351) 223 401 800

‡Shared first authorship

**Figure S1: Schematic representation of the vectors constructed for the new biosensor, including the original vectors where parts were taken from for their construction.** The vector mpFN26A (A) was constructed with parts of pFN26A[luc2\ TK] and pGL4.54 and, the vector mpGL4.35 (B) was constructed with parts of pGL4.35 and pNL1.1[Nluc]. All vectors were acquired to Promega. This procedure was executed by NZYTech according to our instructions.

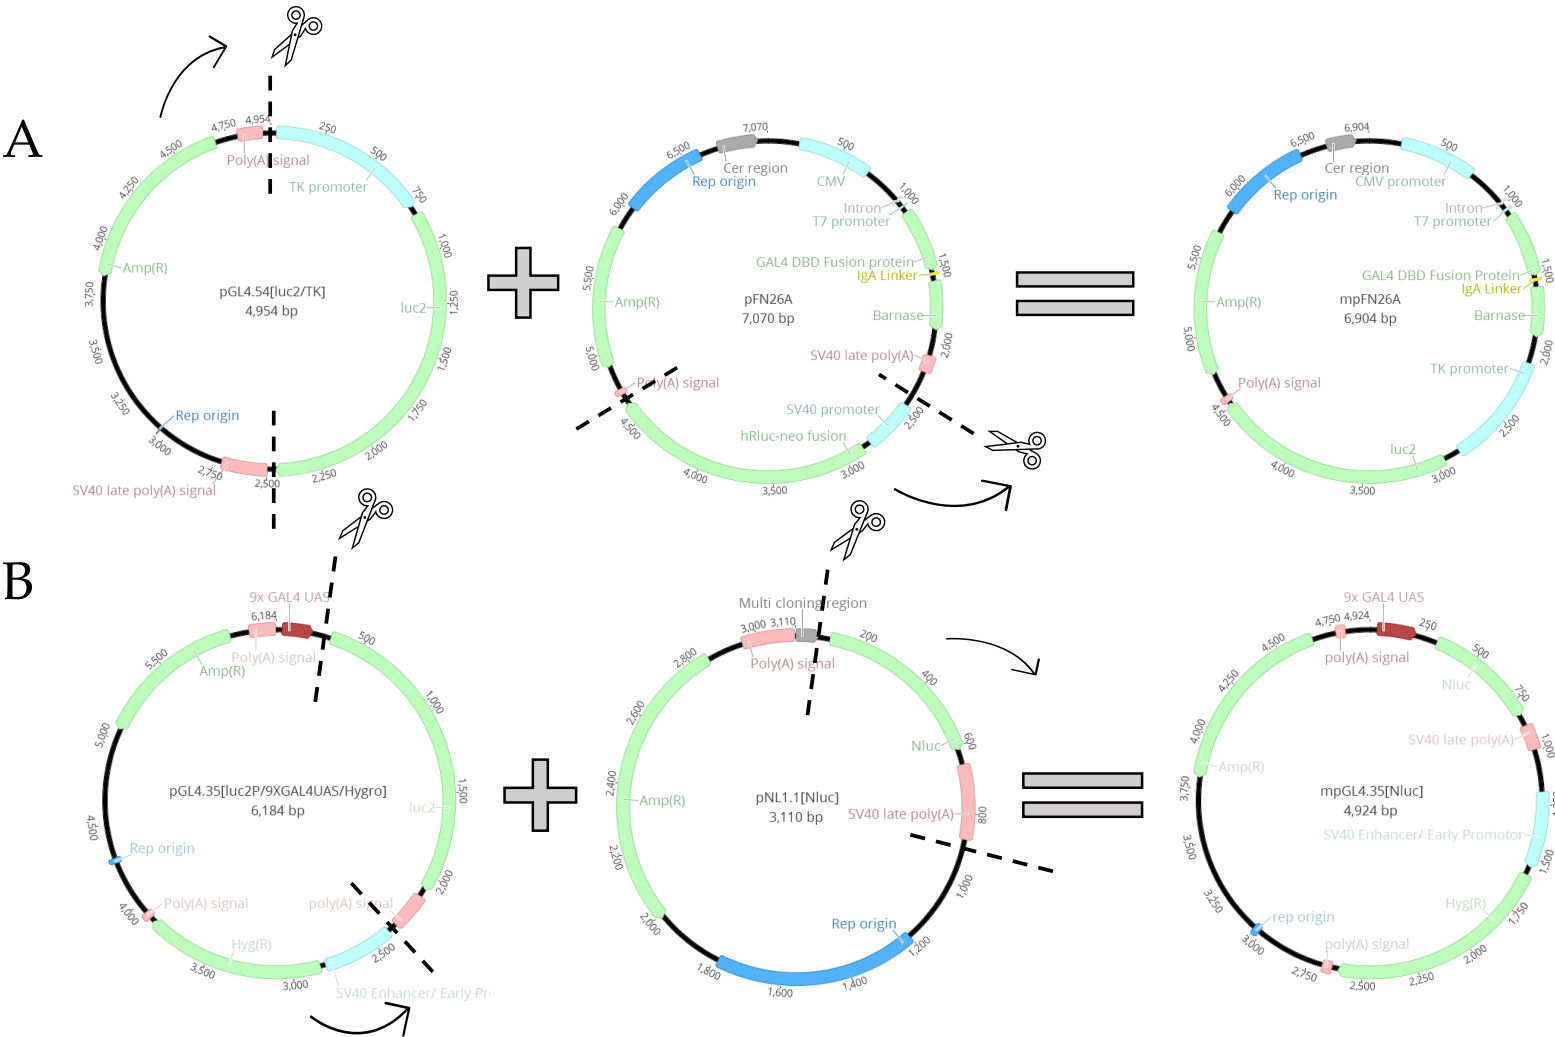

**Table S1: List of primers used.** Sequences of the primers used to amplify the hinge and ligand binding domain (LBD) of *Homo sapiens* PPAR $\alpha$ , - $\beta$  and - $\gamma$ , and specific restriction enzymes used to insert the resulting PCR products into the respective pBIND or mpPFN26A vectors.

| PPAR          | Vectors  | Enzymes | Primers' Sequence                           |
|---------------|----------|---------|---------------------------------------------|
| PPAR $\alpha$ | pBind    | XbaI    | F:5'-CCCTCTAGAATGTCACACAACGCGATT-3'         |
|               |          | KpnI    | R:5'-ATAGGTACCTCAGTACATGTCCCTGTAGA-3'       |
|               | mpPFN26A | SgfI    | F:5'-CGATAGCGATCGCCATGTCACACAACGCGATT-3'    |
|               |          | PmeI    | R:5'-CGTTTAAACTCAGTACATGTCCCTGTAGA-3'       |
| PPAR $\beta$  | pBind    | XbaI    | F:5'-CCCTCTAGAATGTCACACAACGCTATC-3'         |
|               |          | KpnI    | R:5'-ATAGGTACCTTAGTACATGTCCTTGTAGATC-3'     |
|               | mpPFN26A | SgfI    | F:5'-CGATAGCGATCGCCATGTCACACAACGCTATC-3'    |
|               |          | PmeI    | R:5'-CGTTTAAACTTAGTACATGTCCTTGTAGATC-3'     |
| PPAR $\gamma$ | pBind    | BamHI   | F:5'-GCTGCTGGATCCGAATGCCACAGGCCGAGAAGGAG-3' |
|               |          | KpnI    | R:5'-ATAGGTACCCTAGTACAAGTCCTTGTAGATCTCC-3'  |
|               | mpPFN26A | SgfI    | F:5'-CGATAGCGATCGCCATGCCACAGGCCGAGAAGGAG-3' |
|               |          | PmeI    | R:5'-CGTTTAAACCTAGTACAAGTCCTTGTAGATCTCC-3'  |

**Figure S2: Details on the high-performance liquid chromatographer program** used to fractionate the cyanobacteria methanolic crude extracts, consisting of a gradient of ultra-pure water and acetonitrile (10 to 100% acetonitrile), followed by isocratic elution at 100% acetonitrile, during 14 min [41]. Eight fractions (A to H) were collected from each strain.

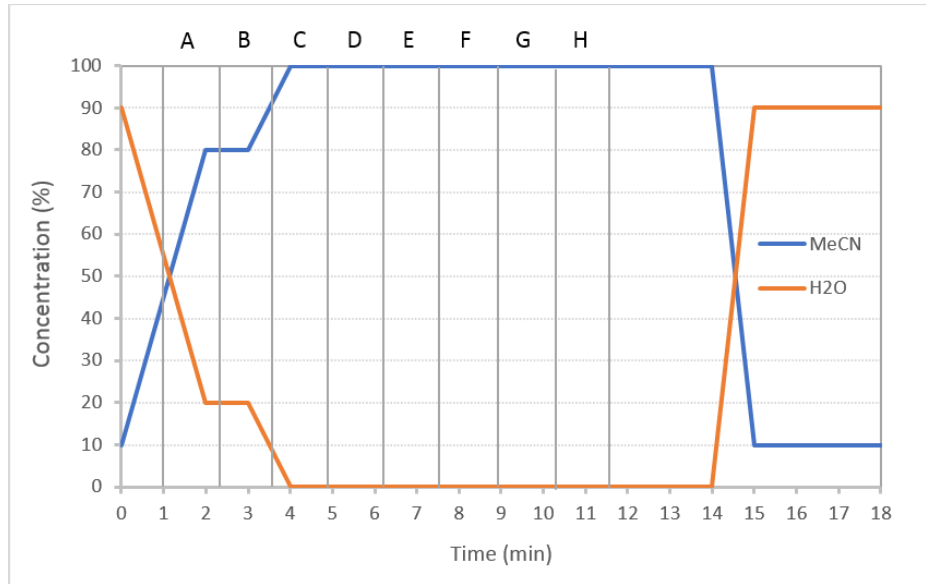

**Table S2: Z-factor interpretation based on Goktug et al. 2013 [50].**

| Z-factor value | Screening interpretation                                    |
|----------------|-------------------------------------------------------------|
| 1              | Ideal/perfect assay, assay validated                        |
| [0.5; 1]       | Excellent assay, assay validated                            |
| [0.0; 0.5]     | Marginal assay, assay validated                             |
| < 0            | DMSO variation and samples signal overlapped, invalid assay |

**Figure S3. Luminescence response observed with mpFN26A/mpGL4.35[Nluc] sensor system in uniplex and triplex modes.** Values observed after exposure to different concentrations of PPAR $\alpha$ , - $\beta$  or - $\gamma$  agonists (GW7647, GW501516 or rosiglitazone, respectively). Dose-response curves (full lines) and EC<sub>50</sub> values (dashed lines) are shown only for the uniplex mode.

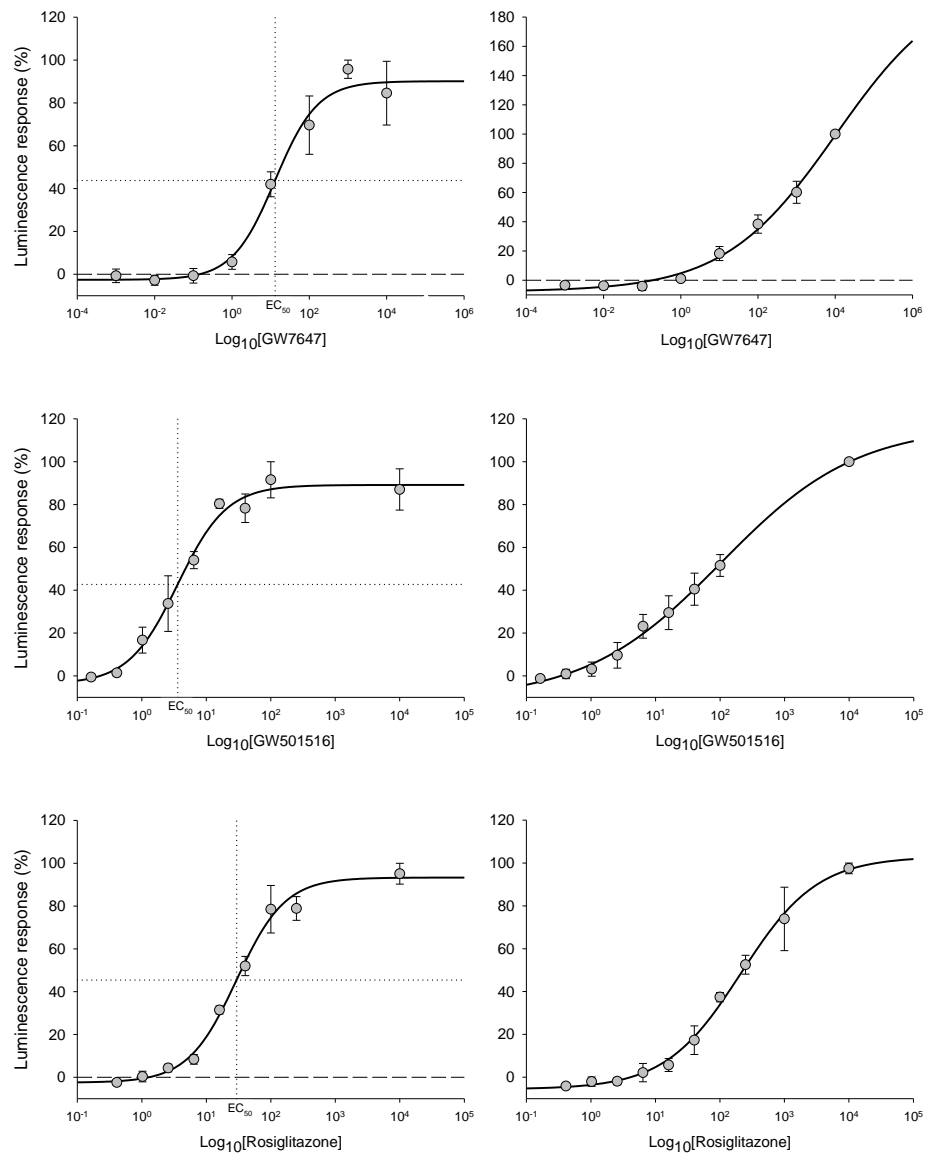

**Table S3. Raw luminescence values of the reporter genes of the vectors used.** Luminescence values of firefly (Fluc) and Renilla (Rluc), and Nanoluc® (Nluc) and firefly luciferase, observed with pBIND[Rluc]/pGL4.35[Fluc] and mpFN26A[Fluc]/ mpGL4.35[Nluc] sensor systems, respectively. Cells were exposed to the solvent control (DMSO; not exceeding 0.1 % per well) and a gradient of rosiglitazone concentrations. Data are shown as mean  $\pm$  standard error of the mean (SEM) (n=3). Black arrows indicate decreased transcription activity of pBind[Rluc] and pFN26A[Fluc] at higher rosiglitazone concentrations.

|                      |          | pBIND/pGL4.35[Fluc] Sensor |                | mpFN26A/mpGL4.35[Nluc] Sensor |                  |
|----------------------|----------|----------------------------|----------------|-------------------------------|------------------|
| Reporter Gene Vector | Rluc     | Fluc                       | Fluc           | Nluc                          |                  |
|                      | pBIND    | pGL4.35                    | mpFN26A        | mpGL4.35                      |                  |
| DMSO                 | 291 ± 47 | 4 789 ± 1 053              | 12 116 ± 988   | 37 457 ± 3 793                |                  |
| Rosiglitazone        | 10 pM    | 336 ± 54                   | 5 358 ± 1 028  | 12 251 ± 491                  | 34 729 ± 2 391   |
|                      | 100 pM   | 361 ± 47                   | 5 306 ± 680    | 12 799 ± 1 272                | 39 509 ± 2 453   |
|                      | 1 nM     | 323 ± 70                   | 5 803 ± 887    | 15 001 ± 1 153                | 50 491 ± 4 113   |
|                      | 10 nM    | 274 ± 29                   | 9 883 ± 2 015  | 14 934 ± 1 961                | 122 416 ± 15 659 |
|                      | 100 nM   | 176 ± 30                   | 13 428 ± 2 516 | 8 680 ± 1 023                 | 193 978 ± 36 234 |
|                      | 1 μM     | 136 ± 26                   | 20 583 ± 4 400 | 6 741 ± 542                   | 235 818 ± 49 563 |
|                      | 10 μM    | 102 ± 15                   | 26 724 ± 5 559 | 6 567 ± 566                   | 254 333 ± 40 749 |

**Table S4. Fold induction values observed with pBIND/pGL4.35[Fluc] and mpFN26A/mpGL4.35[Nluc] sensor systems, in uniplex and triplex modes, in cells exposed to 10  $\mu$ M of each PPAR reference agonist, GW7647 (PPAR $\alpha$ ), GW501516 (PPAR $\beta$ ) or rosiglitazone (PPAR $\gamma$ ).**

| Sensor system              | Mode    | GW7647           | GW501516         | Rosiglitazone    |
|----------------------------|---------|------------------|------------------|------------------|
| mpFN26A/<br>mpGL4.35[Nluc] | Uniplex | 13.66 $\pm$ 7.13 | 13.80 $\pm$ 4.0  | 6.67 $\pm$ 1.05  |
|                            | Triplex | 19.18 $\pm$ 6.14 | 11.42 $\pm$ 1.49 | 13.14 $\pm$ 1.43 |
| pBIND/<br>pGL4.35[Fluc]    | Uniplex | 7.02 $\pm$ 1.82  | 33.90 $\pm$ 2.57 | 15.30 $\pm$ 3.88 |
|                            | Triplex | 5.32 $\pm$ 0.54  | 6.12 $\pm$ 0.72  | 8.88 $\pm$ 1.13  |

169  
170  
171  
172  
173  
174  
175  
176  
  
177  
  
  
  
  
  
  
  
  
  
178  
179

**Table S5: Z-factor values determined for the eleven 96-well plates of the primary screening.** Analysis of 768 cyanobacteria fractions, in twelve plates using the mpFN26A/mpGL4.35[Nluc] sensor system in triplex mode. Positive controls of 10  $\mu$ M WY14643 (PPAR $\alpha$  agonist), 10  $\mu$ M GW501516 (PPAR  $\beta$  agonist) and 10  $\mu$ M rosiglitazone (PPAR $\gamma$  agonist) were evaluated in every plate to perform quality control analysis. Z-score values that did not pass the quality control are highlighted in bold. Plate #11 did not pass quality control with any of the agonists tested and it was discharged.

| Plate | WY14643      | GW501516     | Rosiglitazone | Number of hits |
|-------|--------------|--------------|---------------|----------------|
| #1    | <b>-0.57</b> | 0.41         | 0.55          | 14             |
| #2    | <b>-0.21</b> | 0.62         | 0.69          | 8              |
| #4    | <b>-3.70</b> | 0.81         | 0.81          | 6              |
| #5    | 0.41         | 0.88         | 0.87          | 2              |
| #6    | <b>-1.26</b> | 0.61         | 0.61          | 8              |
| #7    | 0.48         | 0.98         | 0.87          | 3              |
| #8    | <b>-0.02</b> | 0.40         | 0.71          | 4              |
| #9    | <b>-1.84</b> | 0.13         | 0.22          | 2              |
| #10   | 0.05         | 0.87         | 0.93          | 5              |
| #11   | <b>-0.48</b> | <b>-0.16</b> | <b>-0.20</b>  | 7              |
| #12   | <b>-0.88</b> | 0.05         | 0.45          | 8              |

180  
181  
182  
183  
184  
185  
186  
187  
188  
189

**Table S6: Heat map showing the transactivation activity observed in cells upon exposure to fractions of various cyanobacteria strains in the primary screening.** Only the 35 strains that showed activity in at least one fraction are represented. Activity (fold induction) was determined with mpFN26A/mpGL4.35[Nluc] sensor system in triplex mode. Hits correspond to either induction (fold induction > 2) or repression (fold induction < 0.5) of PPARs' activity, and their values are presented in numerals. The heatmap has a continuous color scale, with green (maximum fold induction = 9) indicating PPARs induction, and red PPARs repression (minimum fold induction = 0).

|                 |             | A     | B     | C     | D     | E     | F     | G     | H     |
|-----------------|-------------|-------|-------|-------|-------|-------|-------|-------|-------|
| Nostocales      | LEGE 00248  | 0.439 |       |       |       |       |       |       |       |
|                 | LEGE 00249  |       |       |       |       | 2.208 |       |       |       |
|                 | LEGE 02266  |       |       | 3.504 | 5.902 | 7.127 |       |       |       |
|                 | LEGE 06100  |       | 2.840 |       |       |       |       |       |       |
|                 | LEGE 06105  |       |       |       |       | 2.409 |       |       | 2.289 |
|                 | LEGE 06122* |       |       |       |       | 2.059 |       |       |       |
|                 | LEGE 07177* | 0.207 |       |       | 5.810 | 2.807 |       |       |       |
|                 | LEGE 07189  |       |       |       | 2.051 |       |       |       |       |
|                 | LEGE 07189* |       |       |       |       | 2.090 |       |       |       |
|                 | LEGE 08334  |       |       | 2.057 |       |       |       |       |       |
|                 | LEGE 12449  |       | 0.464 |       |       |       |       | 2.572 |       |
|                 | LEGE 12450  |       |       |       |       |       |       | 2.707 |       |
|                 | PCC 7107    |       | 2.210 | 3.306 | 2.737 |       |       |       | 2.257 |
| Pleurocapsales  | LEGE 07179  |       |       |       |       |       |       |       | 0.500 |
| Chroococcales   | LEGE 03274  | 0.385 |       |       |       |       |       |       |       |
|                 | LEGE 09399  |       |       |       |       |       | 2.257 |       |       |
|                 | LEGE 91094  | 0.395 |       |       |       | 2.069 |       |       | 0.498 |
| Oscillatoriales | LEGE 06078  |       |       |       |       |       | 2.628 |       |       |
|                 | LEGE 06188  |       |       |       |       |       | 2.750 | 2.579 |       |
|                 | LEGE 06204  |       | 0.447 |       |       |       |       |       |       |
|                 | LEGE 07167  |       |       | 2.703 | 3.304 |       |       |       |       |
| Synechococcales | LEGE 03283  |       |       |       |       |       |       |       | 2.840 |
|                 | LEGE 06005  |       |       | 2.037 | 2.417 | 2.759 |       |       |       |
|                 | LEGE 06013  | 2.255 |       |       |       |       |       |       |       |
|                 | LEGE 06098  |       |       | 0.462 |       | 2.229 |       |       |       |
|                 | LEGE 06102  | 0.325 |       |       |       |       |       |       |       |
|                 | LEGE 06115  | 0.478 |       | 2.190 |       |       |       |       |       |
|                 | LEGE 06139  |       | 4.625 | 2.159 |       |       |       |       |       |
|                 | LEGE 06141  | 0.319 |       |       | 0.424 |       |       | 0.221 |       |
|                 | LEGE 07085  |       |       | 5.575 | 4.118 | 2.248 |       |       |       |
|                 | LEGE 07171  |       |       |       |       |       |       | 0.454 |       |
|                 | LEGE 08333  |       |       |       |       |       |       | 8.746 |       |
|                 | LEGE 10387  |       | 0.476 |       |       |       |       |       |       |
|                 | LEGE 13457  | 0.282 |       |       |       |       |       |       |       |
|                 | LEGE 13458  | 0.413 |       |       |       |       |       |       |       |
|                 | LEGE 15481  |       |       |       |       | 2.142 |       |       |       |
| n.d.            | LEGE 00064  |       | 2.198 |       |       |       |       |       |       |
|                 | LEGE 07227  |       |       |       | 2.060 |       |       |       |       |
